# Supplementary material for: Understanding and Perception of Automated Text Generation among the Public: Two Surveys with Representative Samples in Germany
Source: MDPI journal article supplement (doi:10.3390/bs14050353), 2024-04-23
Supplement: s1 [file s1]

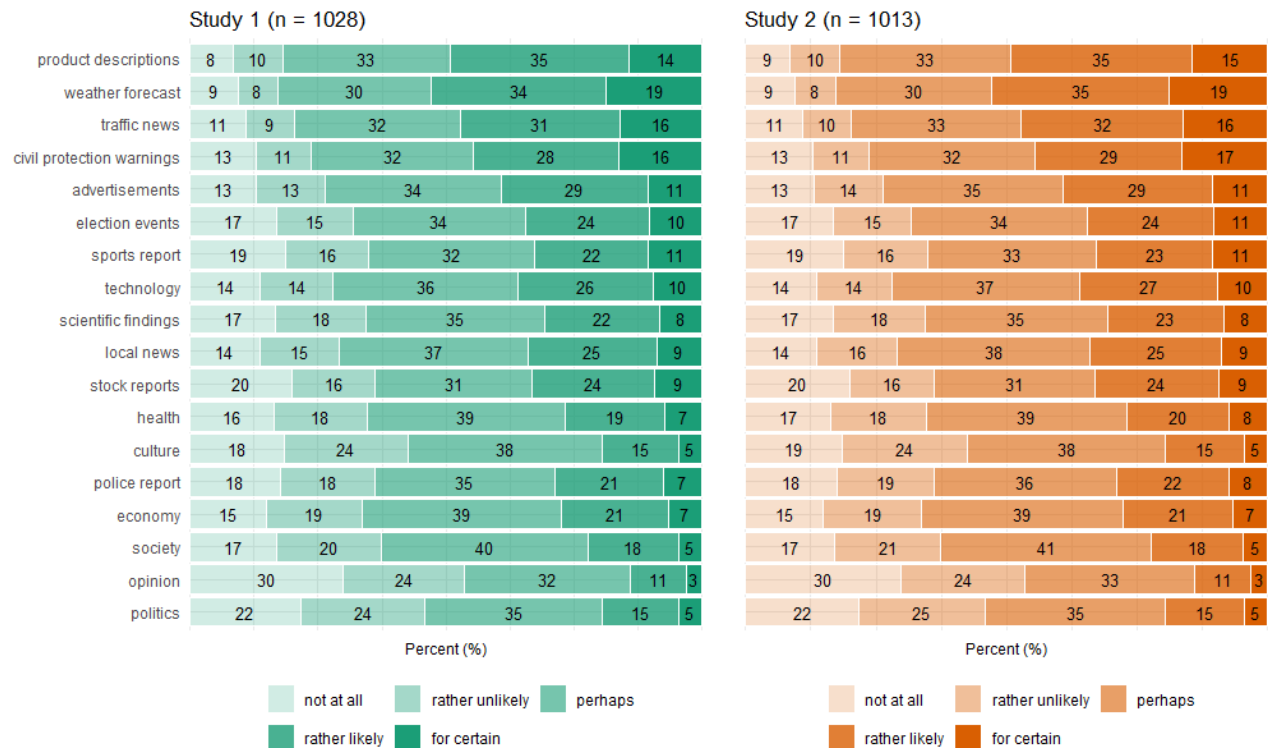

**Supplementary Figure S1.** Relative frequencies (percentage) of participants' perceived probability on how likely they would be to read 18 topics written by AI, by study.

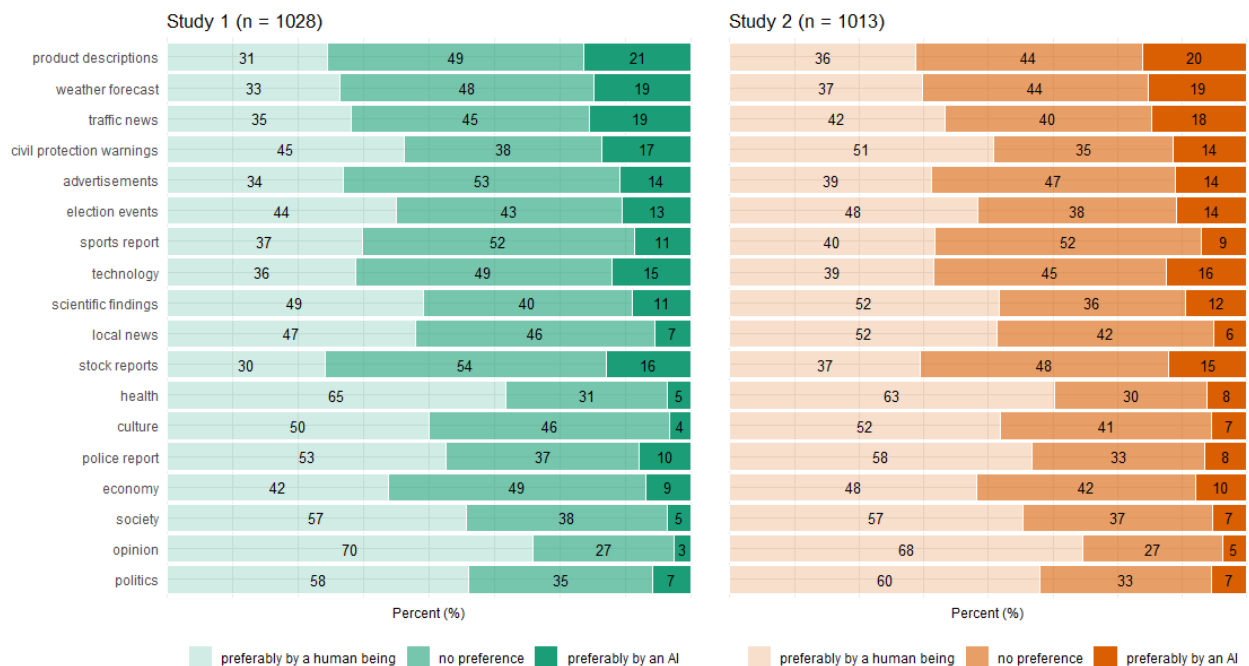

**Supplementary Figure S2.** Relative frequencies (percentage) of participants' author preference regarding 18 topics, by study.

| Variable                             | Study 1                       |                               |                               |                               |                             | Study 2                       |                               |                               |                               |                             |
|--------------------------------------|-------------------------------|-------------------------------|-------------------------------|-------------------------------|-----------------------------|-------------------------------|-------------------------------|-------------------------------|-------------------------------|-----------------------------|
|                                      | <i>M (SD)</i>                 |                               |                               |                               |                             | <i>M (SD)</i>                 |                               |                               |                               |                             |
|                                      | 18-29<br>( <i>n</i> =<br>184) | 30-39<br>( <i>n</i> =<br>182) | 40-49<br>( <i>n</i> =<br>175) | 50-59<br>( <i>n</i> =<br>232) | >60<br>( <i>n</i> =<br>255) | 18-29<br>( <i>n</i> =<br>188) | 30-39<br>( <i>n</i> =<br>188) | 40-49<br>( <i>n</i> =<br>188) | 50-59<br>( <i>n</i> =<br>248) | >60<br>( <i>n</i> =<br>201) |
| Self-assessed knowledge              | 2.49<br>(0.86)                | 2.62<br>(1.06)                | 2.62<br>(0.97)                | 2.45<br>(0.87)                | 2.52<br>(0.93)              | 3.03<br>(1.03)                | 2.85<br>(1.01)                | 2.61<br>(0.96)                | 2.46<br>(0.98)                | 2.34<br>(0.86)              |
| General attitudes                    | 3.22<br>(0.53)                | 3.26<br>(0.62)                | 3.07<br>(0.62)                | 3.07<br>(0.66)                | 3.18<br>(0.71)              | 3.18<br>(0.59)                | 3.12<br>(0.66)                | 2.99<br>(0.69)                | 2.89<br>(0.70)                | 2.86<br>(0.74)              |
| Machine heuristic                    | 3.45<br>(0.65)                | 3.50<br>(0.68)                | 3.38<br>(0.80)                | 3.36<br>(0.79)                | 3.58<br>(0.71)              | 3.42<br>(0.70)                | 3.33<br>(0.80)                | 3.30<br>(0.76)                | 3.21<br>(0.85)                | 3.24<br>(0.80)              |
| Knowledge                            | -                             | -                             | -                             | -                             | -                           | 6.80<br>(3.09)                | 5.92<br>(3.30)                | 5.78<br>(3.13)                | 5.52<br>(3.69)                | 5.53<br>(3.37)              |
| Performance expectancy               | 2.93<br>(0.72)                | 3.02<br>(0.79)                | 2.75<br>(0.76)                | 2.83<br>(0.89)                | 2.76<br>(0.89)              | 3.22<br>(0.85)                | 3.02<br>(0.85)                | 2.99<br>(0.83)                | 2.82<br>(0.90)                | 2.78<br>(0.98)              |
| Effort expectancy                    | 3.25<br>(0.67)                | 3.24<br>(0.75)                | 3.15<br>(0.73)                | 3.21<br>(0.73)                | 3.22<br>(0.80)              | 3.47<br>(0.76)                | 3.30<br>(0.79)                | 3.31<br>(0.71)                | 3.30<br>(0.80)                | 3.17<br>(0.85)              |
| Attitude twd using ATG               | 3.11<br>(0.66)                | 3.11<br>(0.79)                | 2.87<br>(0.81)                | 2.95<br>(0.81)                | 3.01<br>(0.86)              | 3.21<br>(0.82)                | 3.12<br>(0.81)                | 3.03<br>(0.82)                | 2.92<br>(0.89)                | 2.91<br>(0.99)              |
| Anxiety                              | 2.71<br>(0.75)                | 2.69<br>(0.83)                | 2.80<br>(0.79)                | 2.74<br>(0.87)                | 2.55<br>(0.86)              | 2.88<br>(0.88)                | 2.90<br>(0.80)                | 2.74<br>(0.77)                | 2.73<br>(0.84)                | 2.76<br>(0.97)              |
| Behavioral intentions to consume ATG | 2.88<br>(0.72)                | 2.92<br>(0.79)                | 2.71<br>(0.82)                | 2.75<br>(0.83)                | 2.65<br>(0.91)              | 3.02<br>(0.85)                | 2.92<br>(0.88)                | 2.79<br>(0.85)                | 2.67<br>(0.96)                | 2.57<br>(0.95)              |
| Permission                           | 2.72<br>(0.79)                | 2.74<br>(0.66)                | 2.65<br>(0.73)                | 2.64<br>(0.74)                | 2.63<br>(0.69)              | 2.87<br>(0.74)                | 2.86<br>(0.67)                | 2.80<br>(0.71)                | 2.62<br>(0.74)                | 2.65<br>(0.73)              |
| Attitude twd ChatGPT                 | -                             | -                             | -                             | -                             | -                           | 3.28<br>(0.51)                | 3.22<br>(0.63)                | 3.15<br>(0.59)                | 3.07<br>(0.64)                | 2.95<br>(0.74)              |
| Lay attitude twd ChatGPT & ATG       | -                             | -                             | -                             | -                             | -                           | 3.08<br>(0.63)                | 2.97<br>(0.65)                | 2.91<br>(0.72)                | 2.81<br>(0.79)                | 2.67<br>(0.76)              |

**Supplementary Table S1.** Means and standard deviations of all variables separated by age group and study.
